# Supplementary material for: Mycobacterium bovis Wild-Type BCG or Recombinant BCG Secreting Murine IL-18 (rBCG/IL-18) Strains in Driving Immune Responses in Immunocompetent or Immunosuppressed Mice
Source: MDPI journal article supplement (doi:10.3390/vaccines10040615), 2022-04-14
Supplement: s1 [file s1]

## Supplementary Materials

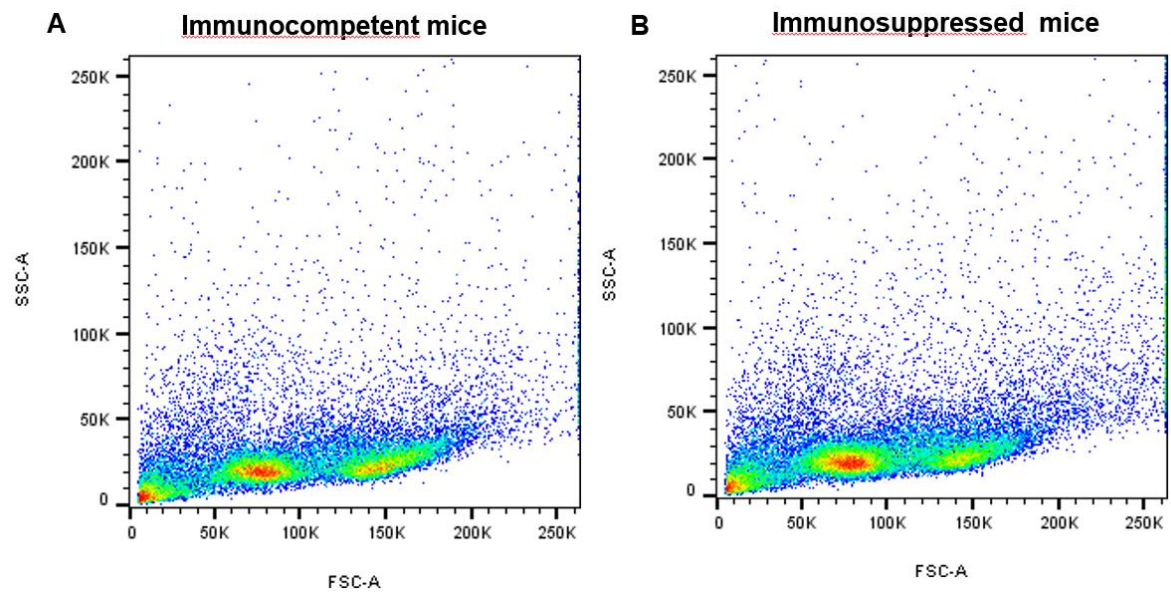

**Figure S1.** Forward (FSC) and side scatter (SSC) images of splenocytes isolated from the spleens of immunocompetent (A) and immunosuppressed (B) C57BL/6 mice. One representative image has been shown per group.

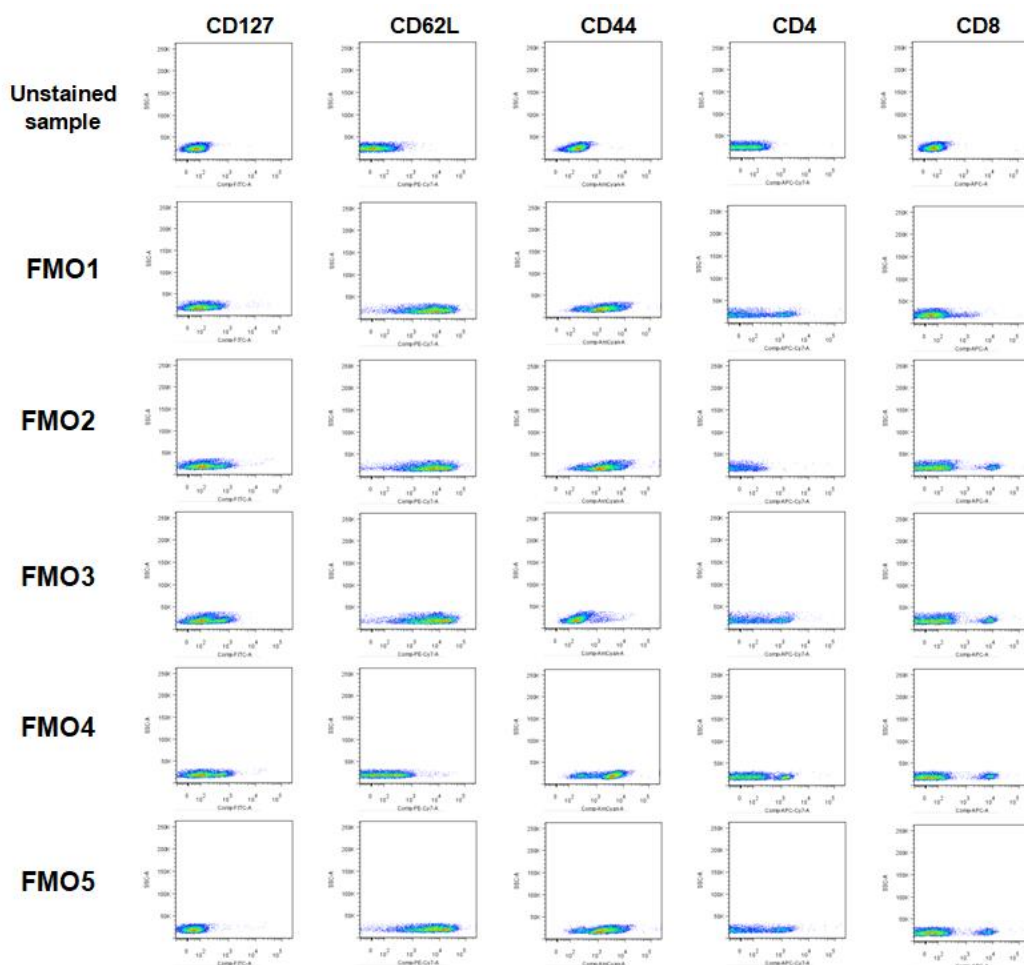

**Figure S2.** Fluorescence minus one (FMO) controls of splenocytes stained with all of the fluorochromes (CD127 FITC, CD62L, PE-VIO770, CD44 V500, CD4 APC-CY7, CD8 APC) minus one of them. FMO1 control containing all fluorochromes except CD8 APC; CD4 APC-CY7 (FMO2); CD44 V500 (FMO3); CD62L PE-VIO770 (FMO4); and CD127 FITC (FMO5).

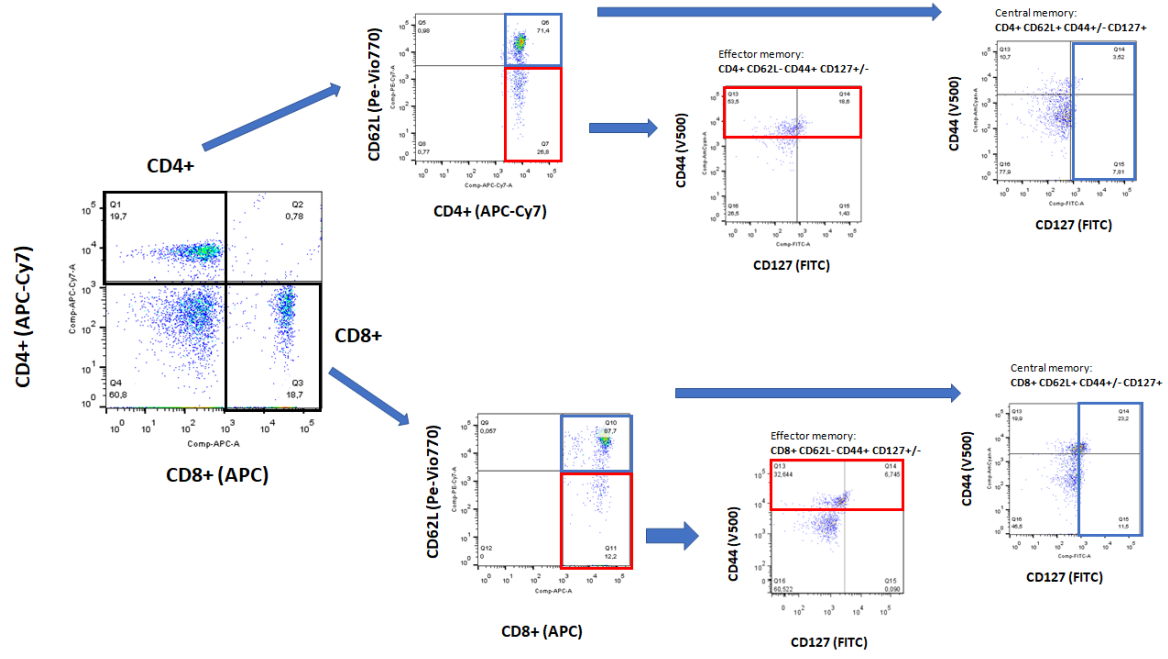

**Figure S3.** Representative gating strategy to identify CD4<sup>+</sup> and CD8<sup>+</sup> T-cell subsets expressing markers for TCM and TEM in the murine spleens.
